# Supplementary material for: In situ generated 2,5-pyrazinedicarboxylate and oxalate ligands leading to a Eu-MOF for selective capture of C2H2 from C2H2/CO2
Source: Royal Society of Chemistry journal article supplement (doi:10.1039/d4dt01168f), 2024-01-01
Supplement: d4dt01168f1.pdf [file d4dt01168f1.pdf]

## Supporting Information

In situ generated 2,5-pyrazinedicarboxylate  
and oxalate ligands leading to a Eu-MOF for  
selective capture of C<sub>2</sub>H<sub>2</sub> from C<sub>2</sub>H<sub>2</sub>/CO<sub>2</sub>

*Fenglan Liang,<sup>a</sup> Deyun Ma,<sup>\*b</sup> Liang Qin,<sup>b</sup> Qiuqun Yu,<sup>b</sup> Jing Chen,<sup>b</sup> Rongxi Liang,<sup>b</sup>*

*Changheng Zhong,<sup>b</sup> Huanzong Liao,<sup>b</sup> Zhiyi Peng,<sup>b</sup>*

<sup>a</sup> *College of Life Science, Zhaoqing University, Zhaoqing, 526061, PR China.*

<sup>b</sup> *School of Food and Pharmaceutical Engineering, Zhaoqing University, Zhaoqing  
526061, China. E-mail: mady@zqu.edu.cn.*

## Experimental

5-methylpyrazine-2-carboxylic acid and  $\text{Eu}(\text{NO}_3)_3 \cdot 6(\text{H}_2\text{O})$  were purchased from Aladdin company.

*Synthesis of  $\{[\text{Eu}_2(\text{pzdc})(\text{ox})_2(\text{H}_2\text{O})_4] \cdot 5\text{H}_2\text{O}\}_n$  (**1**):* To an aqueous solution (10 mL) of dilute nitric acid (0.16 mL), 5-methylpyrazine-2-carboxylic acid (0.138 g, 1 mmol), and  $\text{Eu}(\text{NO}_3)_3 \cdot 6(\text{H}_2\text{O})$  (0.223 g, 0.5 mmol) were added. The mixed solution was sealed in a Teflon reactor (23 mL) and kept at 150 °C for 72 h. Finally, yellow crystals were collected (yield: 58%). Anal. Calcd for  $\text{C}_{10}\text{H}_{20}\text{Eu}_2\text{N}_2\text{O}_{21}$  (**1**): C, 14.8; H, 2.5; N, 3.4. Found: C, 14.6; H, 2.3; N, 3.6. IR (KBr pellet) ( $\text{cm}^{-1}$ ): 3450(s), 1589(vs), 1482(m), 1383(s), 1307(s), 1182(m), 1043(m), 839(m), 773(m), 517(w), 473(w), (Fig. S1).

*X-ray crystal structural determination:* The crystal data of **1** were collected on a Bruker Apex II CCD diffractometer at 50 kV and 30 mA with  $\text{MoK}\alpha$  radiation ( $\lambda = 0.71073 \text{ \AA}$ ). The crystal was kept at 150 K during the measurement. Data collection and reduction were performed using the APEX II software.<sup>1a</sup> The crystal structure of **1** was solved using direct methods followed by least-squares on  $F^2$  using SHELXTL.<sup>1b</sup> Non-hydrogen atoms were refined with independent anisotropic displacement parameters and hydrogen atoms attached to carbon and oxygen were placed in geometrically idealized positions and refined using the riding model. The TOPOS software was used to topologically analyze **1**.<sup>1c-d</sup> The more detail information is listed in the CIF file. Crystal data, as well as detail of data collection and refinement are shown in Table S1. Selected bond lengths and bond angles of **1** are summarized in Table S2.

*Material characterization:* Elemental analyses were performed on a Vario EL III Elemental Analyzer. IR spectra were obtained on a Shimadzu IR-440 spectrometer in the range of 4000-400  $\text{cm}^{-1}$  (KBr disk). Thermogravimetric analysis (TGA) was carried out on an automatic simultaneous thermal analyzer (DTG-60, Shimadzu)

under N<sub>2</sub> atmosphere from 25 to 800 °C with a heating rate of 10 °C/min. Powder X-ray diffraction patterns (PXRD) were measured by using a Bruker AXS D8-Advance diffractometer with Cu-K $\alpha$  ( $\lambda = 1.5418 \text{ \AA}$ ) radiation. The simulated pattern was produced using the Mercury V1.4 program and single-crystal diffraction data.

*Gas adsorption measurements:* CO<sub>2</sub>, C<sub>2</sub>H<sub>2</sub>, and N<sub>2</sub> adsorption isotherms at different temperatures were measured on a Quantachrome Autosorb-iQ instrument under pressures ranging from 0 to 100 kPa. Before each run, about 100 mg of samples were outgassed at 80 °C for 6 h or at 150 °C for 8 h under vacuum to obtain **1a** or **1b**, respectively. Ultrahigh-purity C<sub>2</sub>H<sub>2</sub> (99.99%), CO<sub>2</sub> (99.99%), and N<sub>2</sub> (99.99%) were used. Pore size distribution (PSD) data were obtained from the N<sub>2</sub> adsorption isotherm at 77 K based on the nonlocal density functional theory (NLDFT) model.<sup>2</sup>

*Breakthrough experiments:* The breakthrough experiments were performed at room temperature on a self-made dynamic breakthrough setup as shown in Fig. S2. A stainless-steel column (100 mm in length and 6 mm in diameter) was used for sample packing. Before the breakthrough experiment, 200 mg of sample was packed into the column. The flow rate (2 mL/min) of C<sub>2</sub>H<sub>2</sub>/CO<sub>2</sub> (50:50, v/v) mixture and pressure were controlled by using a pressure-control valve and a mass flow controller. The outlet gas from the column was analyzed using a chromatography with a Porapak Q column (3.15 m in length and 3 mm in diameter) and a thermal conductivity detector (TCD). Helium (23 mL/min) was used as the carrier gas.

*Ideal Adsorbed Solution Theory (IAST):* In practice, it is difficult to evaluate the gas adsorption selectivity of an adsorbent directly. The co-adsorption or breakthrough measurements are the two main methods. However, the adsorption selectivity of gas mixtures can be predicted effectively by IAST according to the isotherms of single component gases.<sup>3</sup> IAST was first proposed by Myers and Prausnitz<sup>3a</sup>, which requires that the adsorption model must be thermodynamic consistent. In this work, IAST was

applied to forecast the adsorption selectivity of C<sub>2</sub>H<sub>2</sub>/CO<sub>2</sub> binary mixtures. The adsorption selectivity is defined as:<sup>3c</sup>

$$S = \frac{x_1 y_2}{x_2 y_1}$$

where  $y$  and  $x$  are the molar fraction in gas phase and adsorbed phase, respectively.

*The isosteric heat,  $Q_{st}$ :* The isosteric heats of C<sub>2</sub>H<sub>2</sub> and CO<sub>2</sub> adsorption,  $Q_{st}$ , defined as:<sup>4</sup>

$$Q_{st} = RT^2 \left( \frac{\partial \ln P}{\partial T} \right)$$

were ascertained by the Clausius-Clapeyron equation. The gas adsorption isotherms obtained at 273, 298 and 318 K were fitted by the double Langmuir (DL) equation, respectively.

*GCMC Simulation:* The adsorption of CO<sub>2</sub> and C<sub>2</sub>H<sub>2</sub> in the channels of **1a** or **1b** were calculated by using the Grand-canonical Monte Carlo (GCMC) at 298 K and 100 kPa.<sup>5</sup> The gas molecule and framework were considered to be rigid. The partial charges for carbon and oxygen atoms (CO<sub>2</sub>) and carbon and hydrogen atoms (C<sub>2</sub>H<sub>2</sub>) molecules were 0.576e/-0.288e and 0.281e/-0.281e, respectively,<sup>6</sup> which are similar to the values in reports.<sup>7</sup> The partial charges for atoms of **1a/1b** were derived from  $Q_{Eq}$  method.<sup>8</sup> The supercell (3 × 3 × 3 unit cell) was used during the simulations. The interaction energies between gas molecule and framework were computed through the Coulomb and Lennard-Jones (LJ) potentials. A cutoff distance of 12.8 Å was used for LJ interactions, and the Coulombic interactions were calculated by using Ewald summation. All parameters for gas molecule and atoms of complex were modeled with the universal forcefield (UFF) embedded in the MS modeling package. For each run, the equilibration and production are performed in 3 × 10<sup>6</sup> steps, respectively.

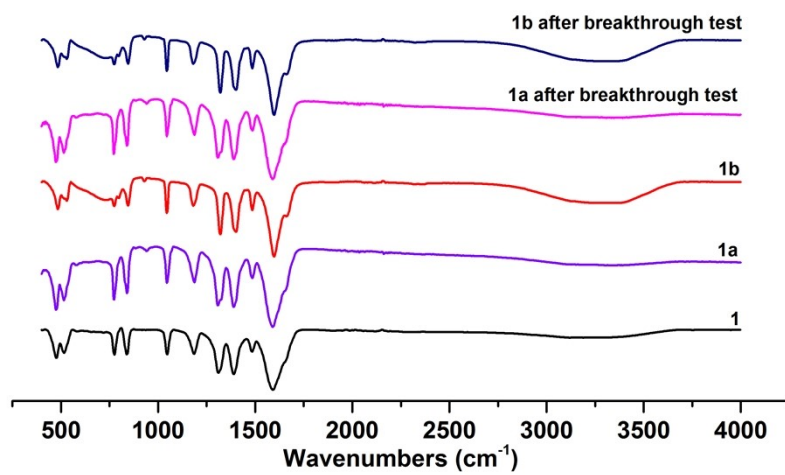

**Figure S1.** IR spectra of **1**, **1a**, and **1b**, and before or after breakthrough test.

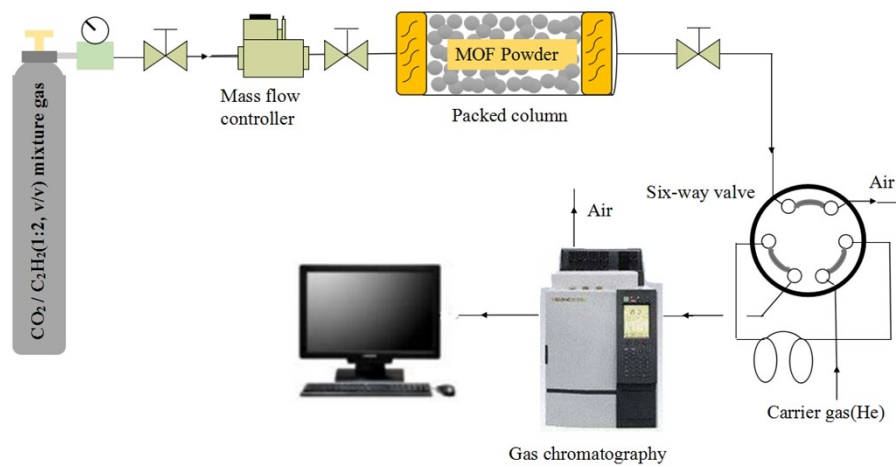

**Figure S2.** The self-assembly apparatus for breakthrough experiments.

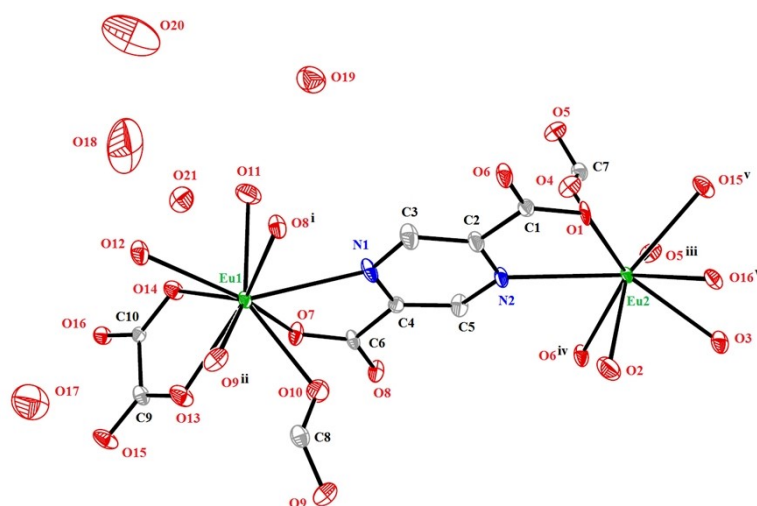

**Figure S3.** The coordination environment of Eu(III) ions in **1**. All H atoms were omitted for clarity. Symmetry codes: i =  $x, 1.5-y, 0.5+z$ ; ii =  $1-x, 2-y, -z$ ; iii =  $-x, 1-y, -z$ ; iv =  $x, 1.5-y, -0.5+z$ ; v =  $-1+x, 1.5-y, -0.5+z$ .

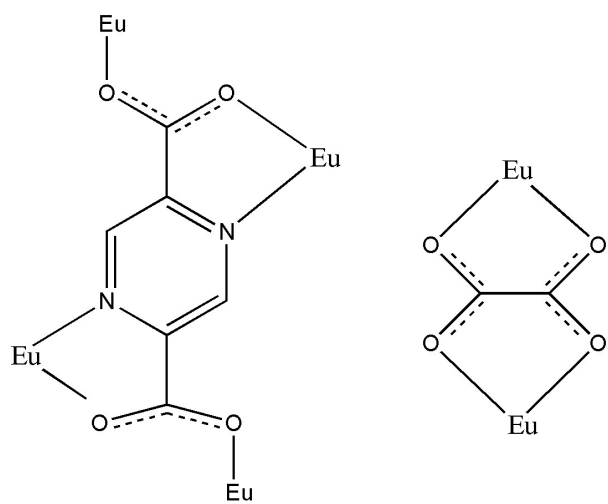

**Figure S4** The coordination modes of pzdc and ox ligands in **1**.



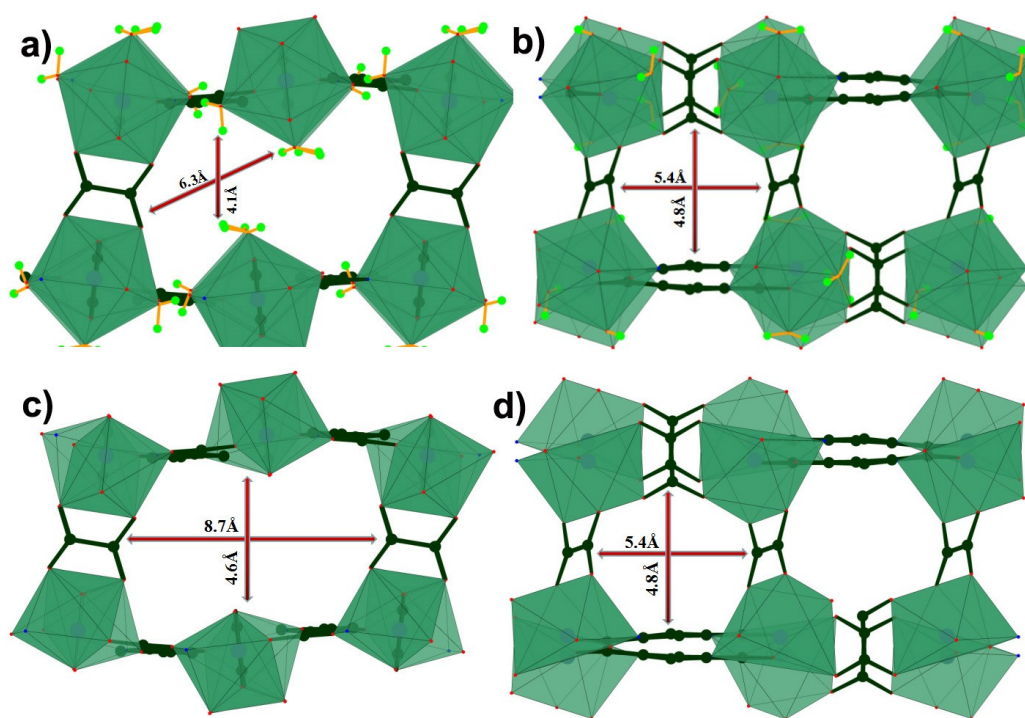

**Figure S5.** (a, b): View of the pore geometry and aperture sizes of **1a** along the *a* and *c*-axis; (c, d): view of the pore geometry and aperture sizes of **1b** along the *a* and *c*-axis. Color codes: Eu, cyan; O, red; N, blue; H, green.

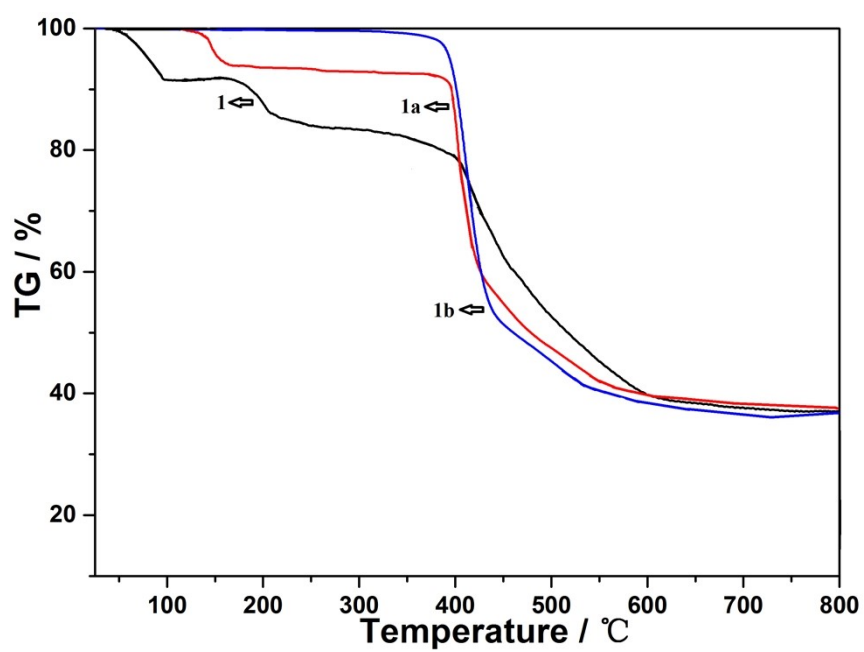

**Figure S6.** Thermogravimetric curves of **1**, **1a** and **1b**.

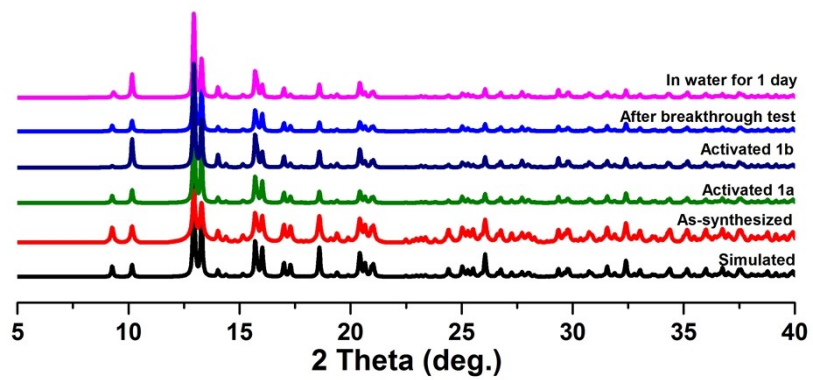

**Figure S7.** PXRD patterns of **1** samples.

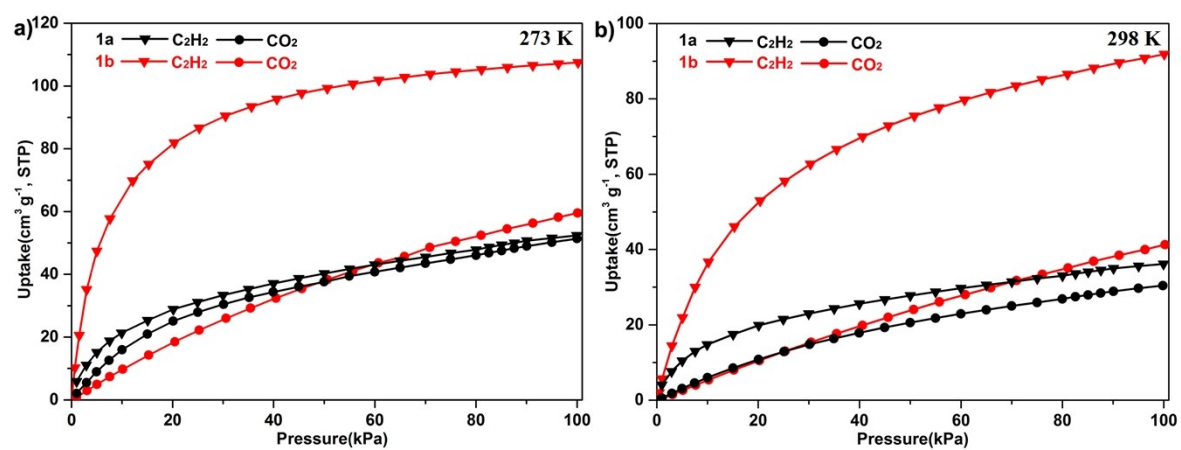

**Figure S8.** CO<sub>2</sub> and C<sub>2</sub>H<sub>2</sub> adsorption isotherms for **1a** and **1b** at 273 K a) and 298 K b), respectively.

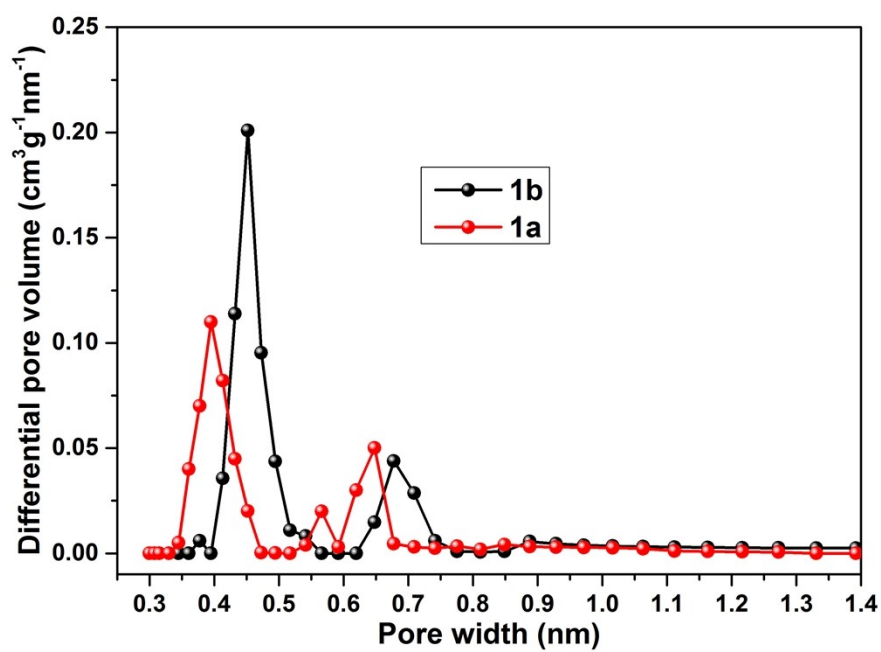

Figure S9. Pore size distribution of **1a** and **1b** based on the NLDFIT model.

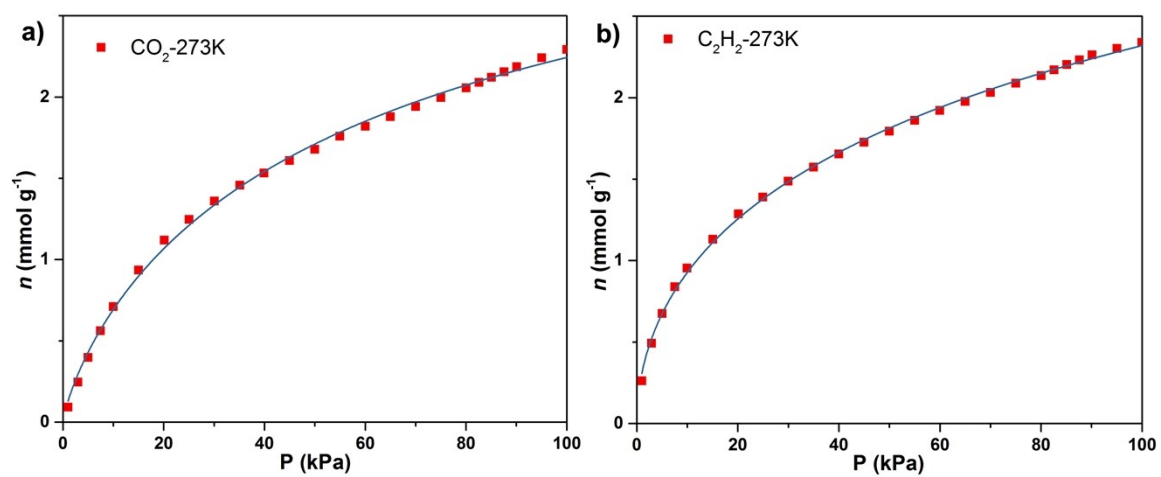

**Figure S10.** The graphs of the double Langmuir (DL) equation fit for adsorption of CO<sub>2</sub> and C<sub>2</sub>H<sub>2</sub> on **1a** at 273 K.

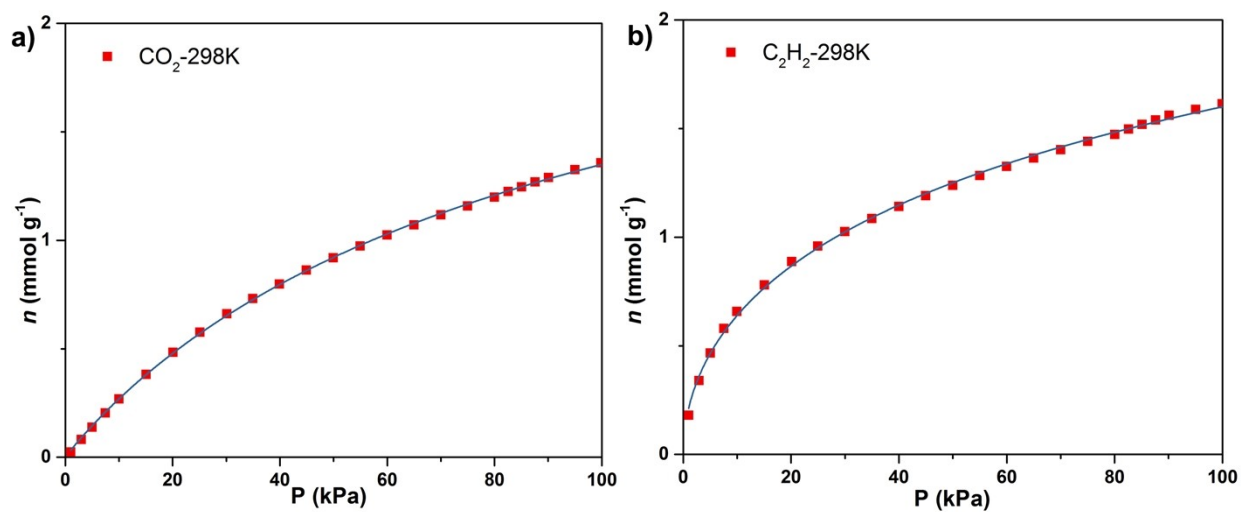

**Figure S11.** The graphs of the double Langmuir (DL) equation fit for adsorption of CO<sub>2</sub> and C<sub>2</sub>H<sub>2</sub> on **1a** at 298 K.

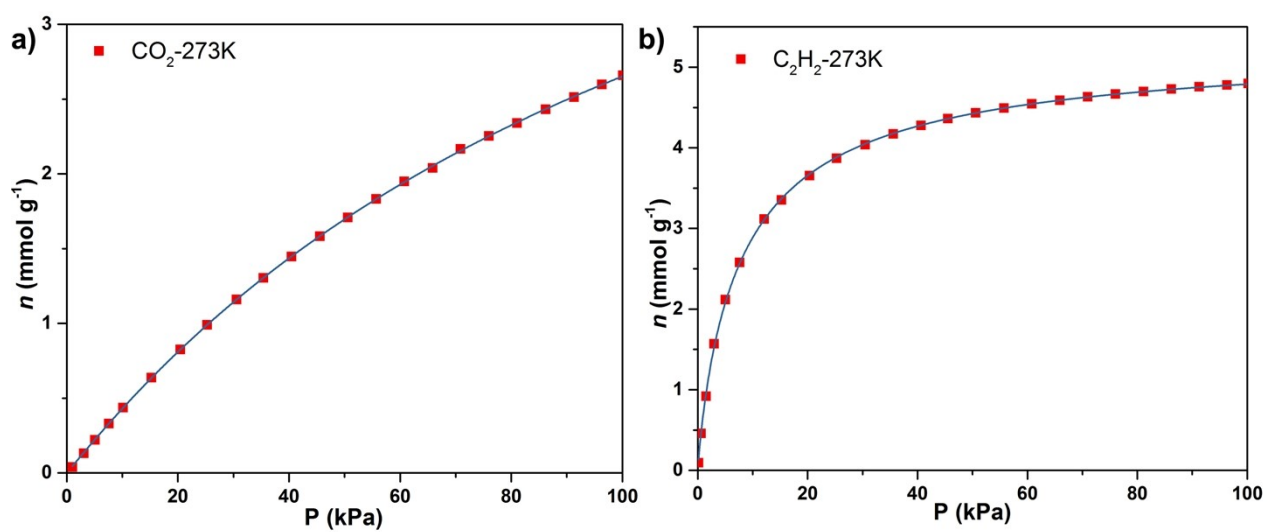

**Figure S12.** The graphs of the double Langmuir (DL) equation fit for adsorption of CO<sub>2</sub> and C<sub>2</sub>H<sub>2</sub> on **1b** at 273 K.



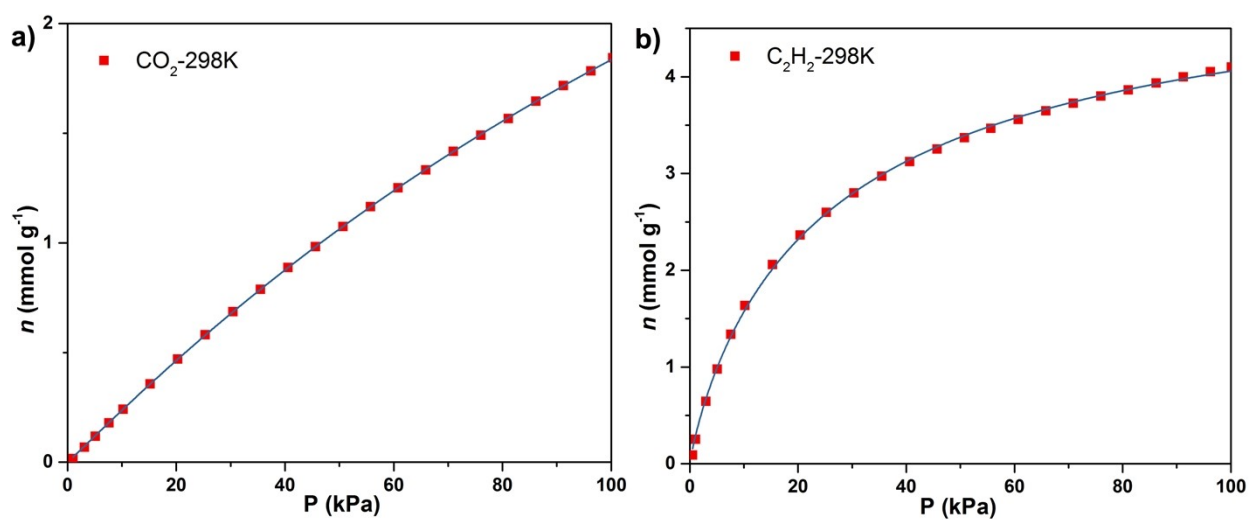

**Figure S13.** The graphs of the double Langmuir (DL) equation fit for adsorption of CO<sub>2</sub> and C<sub>2</sub>H<sub>2</sub> on **1b** at 298 K.

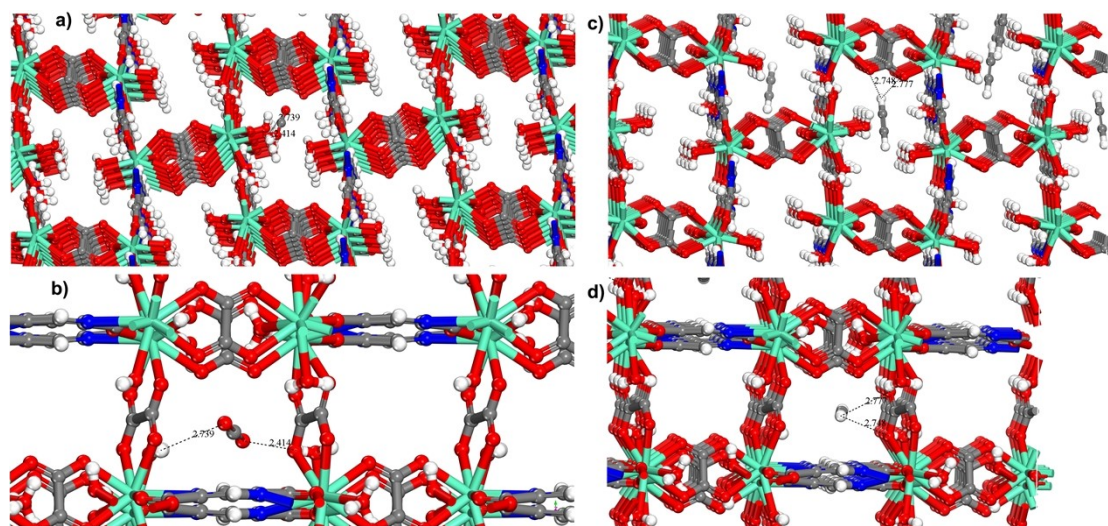

**Figure S14.** The GCMC derived binding site of CO<sub>2</sub> (a and b) and C<sub>2</sub>H<sub>2</sub> (c and d) in the framework of **1a**.

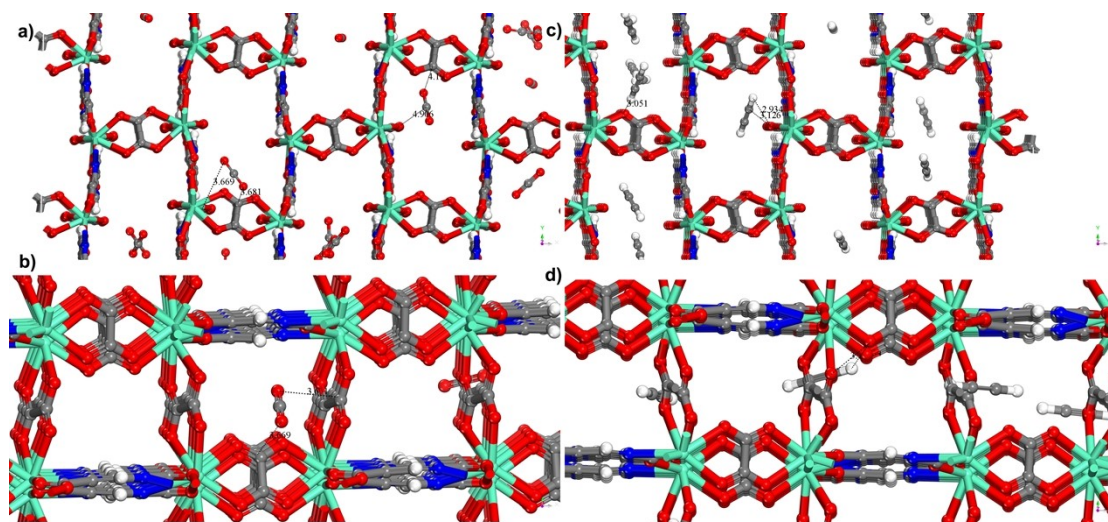

**Figure S15.** The GCMC derived binding site of CO<sub>2</sub> (a and b) and C<sub>2</sub>H<sub>2</sub> (c and d) in the framework of **1b**.

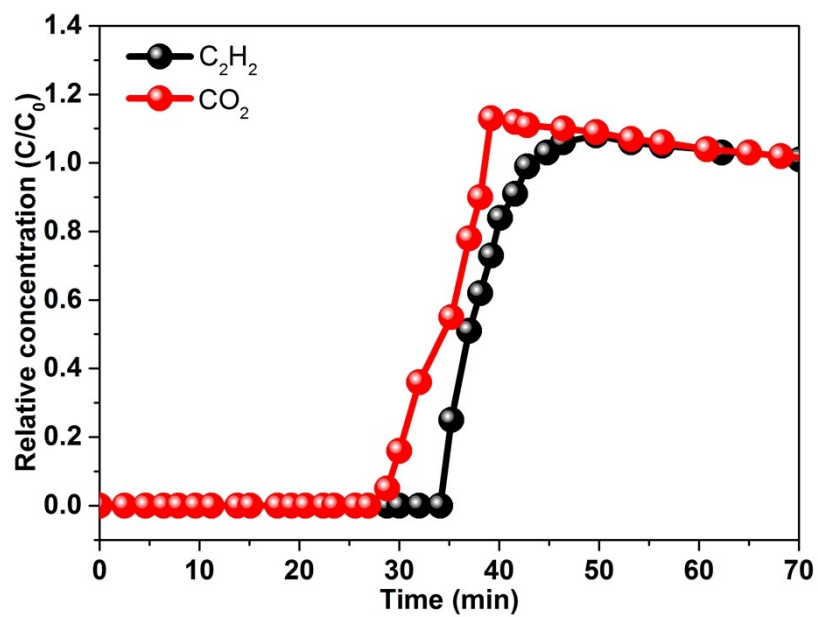

**Figure S16.** Experimental breakthrough curves of a 50:50 (v/v) gas mixture of CO<sub>2</sub> and C<sub>2</sub>H<sub>2</sub> on **1a** at 298 K and 1.0 bar.

**Table S1.** Crystallographic data of complex 1.

|                            |                                                                                |                                                |                                  |
|----------------------------|--------------------------------------------------------------------------------|------------------------------------------------|----------------------------------|
| Empirical formula          | C <sub>10</sub> H <sub>20</sub> O <sub>21</sub> N <sub>2</sub> Eu <sub>2</sub> | Z                                              | 4                                |
| Formula weight             | 808.20                                                                         | D (Mg.m <sup>3</sup> )                         | 2.398                            |
| Temperature (K)            | 293(2)                                                                         | μ (mm <sup>-1</sup> )                          | 40.680                           |
| Size (mm)                  | 0.08×0.08×0.07                                                                 | Reflections collected/unique                   | 4007/3079                        |
| Crystal system             | monoclinic                                                                     | <i>R</i> <sub>int</sub>                        | 0.0463                           |
| Space group                | <i>P</i> 2 <sub>1</sub> / <i>c</i>                                             | <i>F</i> (000)                                 | 1552                             |
| a (Å)                      | 14.5241(4)                                                                     | θ (°)                                          | 3.320-67.250                     |
| b (Å)                      | 13.6671(3)                                                                     | Goodness-of-fit on <i>F</i> <sup>2</sup>       | 1.046                            |
| c (Å)                      | 12.3015(4)                                                                     | <i>R</i> ( <i>I</i> >2σ)                       | <i>R</i> <sub>1</sub> = 0.0441   |
| α(°)                       | 90                                                                             |                                                | w <i>R</i> <sub>2</sub> = 0.1082 |
| β(°)                       | 113.557(3)                                                                     |                                                |                                  |
| γ(°)                       | 90                                                                             | <i>R</i> (all data)                            | <i>R</i> <sub>1</sub> = 0.0607   |
|                            |                                                                                |                                                | w <i>R</i> <sub>2</sub> = 0.1186 |
| <i>V</i> (Å <sup>3</sup> ) | 2238.38(12)                                                                    | Largest diff. peak and hole (Å <sup>-3</sup> ) | 1.54, -1.11                      |

$$R = \frac{\sum(\|F_o\| - \|F_c\|)}{\sum\|F_o\|}$$

$$wR = [\sum w(F_o^2 - F_c^2)^2 / \sum w(F_o^2)]^{1/2}$$

**Table S2.** Selected bond lengths (Å) and bond angles (°) for **1**.

| <b>1</b>                |          |                               |            |
|-------------------------|----------|-------------------------------|------------|
| Eu(1)-O(11)             | 2.414(7) | Eu(1)-N(1)                    | 2.670(7)   |
| Eu(1)-O(13)             | 2.426(6) | Eu(2)-O(2)                    | 2.403(7)   |
| Eu(1)-O(12)             | 2.430(6) | Eu(2)-O(1)                    | 2.421(6)   |
| Eu(1)-O(10)             | 2.430(7) | Eu(2)-O(4)                    | 2.440(6)   |
| Eu(1)-O(7)              | 2.443(6) | Eu(2)-O(15) <sup>v</sup>      | 2.441(6)   |
| Eu(1)-O(8) <sup>i</sup> | 2.445(5) | Eu(2)-N(2)                    | 2.659(6)   |
| O(11)-Eu(1)-O(13)       | 134.4(2) | O(2)-Eu(2)-O(1)               | 83.5(2)    |
| O(11)-Eu(1)-O(12)       | 77.4(2)  | O(2)-Eu(2)-O(4)               | 139.4(2)   |
| O(13)-Eu(1)-O(12)       | 84.5(2)  | O(1)-Eu(2)-O(4)               | 73.8(2)    |
| O(11)-Eu(1)-O(10)       | 140.7(2) | O(2)-Eu(2)-O(15) <sup>v</sup> | 135.4(2)   |
| O(11)-Eu(1)-O(14)       | 68.8(2)  | O(2)-Eu(2)-O(3)               | 80.0(2)    |
| O(13)-Eu(1)-O(14)       | 65.7(2)  | O(1)-Eu(2)-O(3)               | 140.27(18) |
| O(12)-Eu(1)-N(1)        | 142.0(2) | O(2)-Eu(2)-N(2)               | 74.2(2)    |

Symmetry codes: i = x, 1.5-y, 0.5+z; v = -1+x, 1.5-y, -0.5+z.

**Table S3.** Fitting parameters of the Langmuir-Freundlich model for **1a** and **1b**.

|                       | T (K) | <b>1a</b>                     |                 | <b>1b</b>                     |                 |
|-----------------------|-------|-------------------------------|-----------------|-------------------------------|-----------------|
|                       |       | C <sub>2</sub> H <sub>2</sub> | CO <sub>2</sub> | C <sub>2</sub> H <sub>2</sub> | CO <sub>2</sub> |
| <i>q<sub>m</sub></i>  | 273   |                               | 86.7588         | 118.6705                      | 131.8008        |
|                       | 298   | 98.5253                       | 59.4696         | 119.8514                      | 134.8220        |
| <i>k</i>              | 273   |                               | 0.03448         | 0.1525                        | 0.00756         |
|                       | 298   | 0.05054                       | 0.01227         | 0.0551                        | 0.0038          |
| <i>n</i>              | 273   |                               | 0.8009          | 0.8953                        | 1.0176          |
|                       | 298   | 0.5271                        | 0.9633          | 0.8779                        | 1.0312          |
| <i>R</i> <sup>2</sup> | 273   |                               | 0.99778         | 0.99982                       | 0.99997         |
|                       | 298   | 0.99879                       | 0.99978         | 0.99945                       | 0.99998         |

**Table S4.** The uptakes of CO<sub>2</sub>, C<sub>2</sub>H<sub>2</sub> and adsorption selectivities of C<sub>2</sub>H<sub>2</sub>/CO<sub>2</sub> (50:50 CO<sub>2</sub>:C<sub>2</sub>H<sub>2</sub>, v/v) over reported Ln-MOFs for selective adsorption of C<sub>2</sub>H<sub>2</sub> over CO<sub>2</sub>.

| Adsorbents | <i>T</i> (K) | <i>P</i> (kPa) | CO <sub>2</sub> uptake (cm <sup>3</sup> g <sup>-1</sup> ) <sup>a</sup> | C <sub>2</sub> H <sub>2</sub> uptake (cm <sup>3</sup> g <sup>-1</sup> ) <sup>a</sup> | Selectivity (IAST) <sup>b</sup> | Ref.      |
|------------|--------------|----------------|------------------------------------------------------------------------|--------------------------------------------------------------------------------------|---------------------------------|-----------|
| UPC-80     | 298          | 100            | 39.23                                                                  | 77.28                                                                                | 6.34                            | 7         |
| JXNU-5     | 298          | 100            | 34.80                                                                  | 55.9                                                                                 | 9.0                             | 7         |
| JXNU-10    | 298          | 100            | 24.00                                                                  | 53.3                                                                                 | 2.68                            | 8         |
| 1-Eu       | 298          | 100            | 62.3                                                                   | 109.2                                                                                | 4.1                             | 9         |
| UTSA-222   | 298          | 100            | 42.70                                                                  | 85.3                                                                                 | 4.6                             | 10        |
| BUT-70B    | 298          | 100            | 10.69                                                                  | 81.7                                                                                 | 8.5                             | 11        |
| <b>1a</b>  | 298          | 100            | 30.39                                                                  | 36.15                                                                                | 3.2                             | this work |
| <b>1b</b>  | 298          | 100            | 41.20                                                                  | 91.84                                                                                | 12.7                            | this work |

<sup>a</sup> Gravimetric uptake (cm<sup>3</sup> g<sup>-1</sup>) at 100 kPa. <sup>b</sup> Selectivity calculated from IAST for the C<sub>2</sub>H<sub>2</sub>/CO<sub>2</sub> (50:50, v/v) mixture at 100 kPa.



**Table S5.** Comparison of breakthrough experiments parameters of SIFSIX-3-Ni, CD-MOF-1, CD-MOF-2 and **1a**.

| Adsorbents | T (K) | Sample weight (mg) | Total flow (mL min <sup>-1</sup> ) | C <sub>2</sub> H <sub>2</sub> /CO <sub>2</sub> mixture | Breakthrough time (min) | Selectivity (IAST) | Ref.      |
|------------|-------|--------------------|------------------------------------|--------------------------------------------------------|-------------------------|--------------------|-----------|
| UPC-80     | 298   | unspecified        | 2.0                                | 50:50, v/v                                             | 15.8                    | 6.34               | 13a       |
| JXNU-5     | 298   | 460                | 2.0                                | 50:50, v/v                                             | 14.0                    | 9.0                | 13b       |
| JXNU-10    | 298   | unspecified        | 2.0                                | 50:50, v/v                                             | 26.1                    | 2.68               | 13c       |
| 1-Eu       | 298   | 655.9              | 2.0                                | 50:50, v/v                                             | 27.3                    | 4.1                | 13f       |
| <b>1b</b>  | 298   | 200                | 2.0                                | 50:50, v/v                                             | 28.8                    | 12.72              | this work |

## References

- [1] (a) Bruker. APEX II Software, version 6.3.1; Bruker AXS Inc: Madison, Wisconsin, USA, 2004; (b) G. M. Sheldrick, A short history of SHELX. *Acta Crystallogr., Sect. A*, 2008, **64**, 112–122; (c) V. A. Blatov, A. P. Shevchenko, D. M. Proserpio, *Cryst. Growth Des.*, 2014, **14**, 3576–3586; (d) G. Nandi, R. Thakuria, H. M. Titi, R. Patra, I. Goldberg, *CrystEngComm*, 2014, **16**, 5244–5256.
- [2] Y. Zhu, S. Murali, M. D. Stoller, K. J. Ganesh, W. Cai, P. J. Ferreira, A. Pirkle, R. M. Wallace, K. A. Cychosz, M. Thommes, D. Su, E. A. Stach, R. S. Ruoff, *Science*, 2011, **332**, 1537-1541.
- [3] (a) A.L. Myers, J.M. Prausnitz, *AIChE J.*, 1965, **11**, 121-127; (b) K. Sumida, D.L. Rogow, J.A. Mason, T.M. McDonald, E.D. Bloch, Z.R. Herm, T.H. Bae, J.R. Long, *Chem. Rev.*, 2012, **112**, 724-781; (c) Y. Chen, D. Lv, J. Wu, J. Xiao, H. Xi, Q. Xia, Z. Li, *Chem. Eng. J.*, 2017, **308**, 1065-1072; (d) F.A. Kloutse, A. Hourri, S. Natarajan, P. Benard, R. Chahine, *Sep. Purif. Technol.*, 2018, **197**, 228-236; (e) F.A. Kloutse, A. Hourri, S. Natarajan, P. Benard, R. Chahine, *Micropor. Mesopro. Mater.*, 2018, **271**, 175-185.
- [4] (a) L. Zhang, K. Jiang, Y. Yang, Y. Cui, B. Chen, G. Qian, *J. Solid State Chem.*, 2017, **255**, 102-107; (b) H. Pan, J.A. Ritter, P.B. Balbuena, *Langmuir*, 1998, **14**, 6323-6327; (c) A. F. Kloutse, R. Zacharia, D. Cossement, R. Chahine, R. Balderas-Xicohtencatl, H. Oh, B. Streppel, M. Schlichtenmayer, M. Hirsche, *Appl. Phys. A*, 2015, **121**, 1417-1424.
- [5] (a) J. P. Perdew, Y. Wang, *Phys. Rev. B*, 1992, **45**, 13244-13249; (b) D. Wu, C. Wang, B. Liu, Q. Yang, C. Zhong, *AIChE J.*, 2012, **58**, 2078-2084; (c) Sorption, v. Accelrys, Inc, San Diego, 2005.
- [6] (a) A. Hirotani, K. Mizukami, R. Miura, H. Takaba, T. Miya, A. Fahmi, A. Stirling, M. Kubo and A. Miyamoto, *Appl. Surf. Sci.*, 1997, **120**, 81; (b) H.-H. Wang, W.-J. Shi, L. Hou, G.-P. Li, Z. Zhu and Y.-Y. Wang, *Chem. Eur. J.*, 2015, **21**, 16525.

[7] (a) J. Yu and P. B. Balbuena, *J. Chem. Phys. C*, 2013, **117**, 3383; (b) R. Vaidhyanathan, S. S. Iremonger, G. K. H. Shimizu, P. G. Boyd, S. Alavi and T. K. Woo, *Angew. Chem. Int. Ed.*, 2012, **51**, 1826.

[8] H. Y. Yang, Y. Z. Li, W. J. Shi, L. Hou, Y. Y. Wang, Z. Zhu, *Dalton Trans.*, 2017, **46**, 11722-11727
